# Supplementary material
Source: publisher figshare collection journal article supplement (https://gsajournals.figshare.com/ndownloader/files/24740738)
Supplement: Supplementary file 1 [file 24740738]

**Table S4,** **Mutation rate estimates under several scenarios of allelic bias at *de novo* mutant sites in control mutation accumulation lines**

| **Predicted read freq.** | **mutation rate** | **CI lower** | **CI upper** | **Lines (Control)** |
| --- | --- | --- | --- | --- |
| 0.5 | 6.44E-11 | 2.58E-11 | 1.44E-10 | L. minor (GPL7) |
|  | 5.42E-11 | 1.99E-11 | 1.28E-10 | S. polyrhiza (CC) |
|  | 7.68E-11 | 3.61E-11 | 1.54E-10 | S. polyrhiza (GP23) |
|  |  |  |  |  |
| 0.2 | 2.17E-10 | 8.71E-11 | 4.87E-10 | L. minor (GPL7) |
|  | 1.02E-10 | 3.74E-11 | 2.40E-10 | S. polyrhiza (CC) |
|  | 1.42E-10 | 6.70E-11 | 2.85E-10 | S. polyrhiza (GP23) |
|  |  |  |  |  |
| 0.1 | 1.68E-09 | 6.74E-10 | 3.76E-09 | L. minor (GPL7) |
|  | 4.38E-10 | 1.61E-10 | 1.03E-09 | S. polyrhiza (CC) |
|  | 5.78E-10 | 2.72E-10 | 1.16E-09 | S. polyrhiza (GP23) |
